# Supplementary material for: The Landscape of Repetitive Elements in the Refined Genome of Chilli Anthracnose Fungus Colletotrichum truncatum
Source: Front Microbiol. 2018 Oct 4;9:2367. doi: 10.3389/fmicb.2018.02367 (PMC6180176; doi:10.3389/fmicb.2018.02367)
Supplement: Supplementary file 1 [file Table_1.XLSX]

## Sheet: Sheet1
Table S1. Classification of RepeatMasker generated unspecified transposable elements of C. truncatum based on Repbase homologs
Repeat	Classification
5SrRNA-1_BG	SINE
5SrRNA-1_BG	SINE
5SrRNA-1_BG	SINE
5SrRNA-1_BG	SINE
5SrRNA-1_BG	SINE
5SrRNA-1_BG	SINE
5SrRNA-1_BG	SINE
5SrRNA-1_BG	SINE
5SrRNA-1_BG	SINE
ATCOPIA19I	LTR/Copia
ATCOPIA24I	LTR/Copia
ATCOPIA24I	LTR/Copia
ATCOPIA24I	LTR/Copia
ATCOPIA24I	LTR/Copia
ATCOPIA24I	LTR/Copia
ATCOPIA28_I	LTR/Copia
ATCOPIA28_I	LTR/Copia
ATCOPIA28_I	LTR/Copia
ATCOPIA41I	LTR/Copia
ATCOPIA43I	LTR/Copia
ATCOPIA52_I	LTR/Copia
ATCOPIA85_I	LTR/Copia
ATHILA4A_I	LTR
ATHILA7A_I	LTR
BEL-103_AA-I	LTR
BEL-10_Adi-I	LTR
BEL-10_CGi-I	LTR
BEL-11_DBp-I	LTR
BEL-11_SI-I	LTR
BEL-131_AA-I	LTR
BEL15-LTR_DR	LTR
BEL-160_AA-I	LTR
BEL-16_DPu-I	LTR
BEL-16_DPu-I	LTR
BEL17-I_DR	LTR
BEL-181_AA-I	LTR
BEL-18_CQ-I	LTR
BEL-192_AA-I	LTR
BEL-195_AA-I	LTR
BEL-198_AA-I	LTR
BEL-1_DAn-I	LTR
BEL1_MH-I	LTR
BEL-1N_AA-I	LTR
BEL-203_AA-I	LTR
BEL-20_CQ-I	LTR
BEL-23_CQ-I	LTR
BEL-242_AA-I	LTR
BEL-248_AA-I	LTR
BEL-249_AA-I	LTR
BEL-26_DR-I	LTR
BEL-27_AA-I	LTR
BEL-286_AA-I	LTR
BEL-2_Ano-I	LTR
BEL2_Cis_I	LTR
BEL-2_DPu-I	LTR
BEL-35_AA-I	LTR
BEL-3_DGri-I	LTR
BEL-3_PBa-I	LTR
BEL-40_DRe-I	LTR
BEL4-I_AG	LTR
BEL-4_LG-I	LTR
BEL-4_NVi-I	LTR
BEL-4_SSa-I	LTR
BEL-4_SSa-I	LTR
BEL-52_AA-I	LTR
BEL-57_DRe-I	LTR
BEL-58_CQ-I	LTR
BEL-58_DRe-I	LTR
BEL5_Cis_I	LTR
BEL-5_CSa-I	LTR
BEL-5_DEu-I	LTR
BEL-5-I_NV	LTR
BEL-5_LH-I	LTR
BEL-601_AA-I	LTR
BEL-602_AA-I	LTR
BEL-604_AA-I	LTR
BEL-624_AA-I	LTR
BEL-634_AA-I	LTR
BEL-645_AA-I	LTR
BEL-646_AA-I	LTR
BEL-6_CSa-I	LTR
BEL-6_DPer-I	LTR
BEL-70_CQ-I	LTR
BEL-74_AA-I	LTR
BEL-74_CQ-I	LTR
BEL-7_DPer-I	LTR
BEL-7_GA-I	LTR
BEL-7-I_NV	LTR
BEL-8_LG-I	LTR
BEL-9_CSa-I	LTR
BEL-9_DAn-I	LTR
BEL-9_NV-I	LTR
BEL-9_SSa-I	LTR
BHIKHARI-5-I_DR	LTR
Copia-105_SB-I	LTR/Copia
Copia-109_SB-I	LTR/Copia
Copia10-I_CR	LTR/Copia
Copia10-I_CR	LTR/Copia
Copia-10_Mad-I	LTR/Copia
Copia-116_BRa-I	LTR/Copia
Copia-11_CQ-I	LTR/Copia
Copia-11_CQ-I	LTR/Copia
Copia-11_CQ-I	LTR/Copia
Copia-11_JC-I	LTR/Copia
Copia-11_Sit-I	LTR/Copia
Copia-122_AA-I	LTR/Copia
Copia-124_CCri-I	LTR/Copia
Copia-127_AA-I	LTR/Copia
Copia-12_AIp-I	LTR/Copia
Copia-12_CCri-I	LTR/Copia
Copia-12_LU-I	LTR/Copia
Copia-12_NN-I	LTR/Copia
Copia-12_PAb-I	LTR/Copia
Copia-12_PR-I	LTR/Copia
Copia-12_PR-I	LTR/Copia
Copia-12_RC-I	LTR/Copia
Copia-131_BRa-I	LTR/Copia
Copia-13_AIp-I	LTR/Copia
Copia-13_EPa-I	LTR/Copia
Copia-13_GM-I	LTR/Copia
Copia-13_LH-I	LTR/Copia
Copia-13_LH-I	LTR/Copia
Copia-13_LH-I	LTR/Copia
Copia-13_MN-I	LTR/Copia
Copia-13_PTc-I	LTR/Copia
Copia-13_Sit-I	LTR/Copia
Copia-13_SSa-I	LTR/Copia
Copia-14_BG-I	LTR/Copia
Copia-14_BG-I	LTR/Copia
Copia-14_BG-I	LTR/Copia
Copia-14B_OS-I	LTR/Copia
Copia-14_GM-I	LTR/Copia
Copia-14_GM-I	LTR/Copia
Copia-14_NN-I	LTR/Copia
Copia-14_PSo-I	LTR/Copia
Copia-14_ST-I	LTR/Copia
Copia-152_CCri-I	LTR/Copia
Copia-15_ALY-I	LTR/Copia
Copia-15_MN-LTR	LTR/Copia
Copia-15_PTc-I	LTR/Copia
Copia15-PTR_I	LTR/Copia
Copia-15_RC-I	LTR/Copia
Copia-15_Sit-I	LTR/Copia
Copia-16_DPu-I	LTR/Copia
Copia-16_PTc-I	LTR/Copia
Copia-16_Sit-I	LTR/Copia
Copia-17_AA-I	LTR/Copia
Copia-17_DPu-I	LTR/Copia
Copia-17_MLP-I	LTR/Copia
Copia17-NVi_I	LTR/Copia
Copia-17_PGr-I	LTR/Copia
Copia-17_PPe-I	LTR/Copia
Copia-17_Sit-I	LTR/Copia
Copia-18_Cia-I	LTR/Copia
Copia-18_EPa-I	LTR/Copia
Copia-18_MN-I	LTR/Copia
Copia-18_MN-I	LTR/Copia
Copia-18_PTc-I	LTR/Copia
Copia-19_JC-I	LTR/Copia
Copia-19_RC-I	LTR/Copia
Copia-1_AM-I	LTR/Copia
Copia-1_ATe-I	LTR/Copia
Copia-1_ATe-I	LTR/Copia
Copia-1_ATe-I	LTR/Copia
Copia-1_ATe-I	LTR/Copia
Copia-1_CMe-I	LTR/Copia
Copia-1_CMe-I	LTR/Copia
Copia-1_CMe-I	LTR/Copia
Copia-1_ES-I	LTR/Copia
Copia-1_ES-I	LTR/Copia
Copia-1_ES-I	LTR/Copia
Copia-1_HAE-I	LTR/Copia
COPIA1-I_OS	LTR/Copia
Copia-1_LH-I	LTR/Copia
Copia1-NVi_I	LTR/Copia
Copia-1_SCH-I	LTR/Copia
Copia-1_SLL-I	LTR/Copia
Copia-1_ST-LTR	LTR/Copia
Copia-1_ST-LTR	LTR/Copia
Copia-1_ST-LTR	LTR/Copia
Copia-1_TCa-I	LTR/Copia
Copia-1_TMe-I	LTR/Copia
Copia-1_VA-I	LTR/Copia
Copia-1_VA-I	LTR/Copia
Copia-1_VA-I	LTR/Copia
Copia-1_VA-I	LTR/Copia
COPIA1_ZM_I	LTR/Copia
Copia-20_EPa-I	LTR/Copia
Copia-21_ATr-I	LTR/Copia
Copia-21_ECa-I	LTR/Copia
Copia-21_LU-I	LTR/Copia
Copia-21_OS-I	LTR/Copia
Copia-21_PIT-I	LTR/Copia
Copia-21_TC-I	LTR/Copia
Copia-22_GR-I	LTR/Copia
Copia-22_GR-I	LTR/Copia
Copia-22_GR-I	LTR/Copia
Copia-22_PX-I	LTR/Copia
Copia-22_ST-I	LTR/Copia
Copia-24_BD-I	LTR/Copia
Copia-24_LU-I	LTR/Copia
Copia-24_LU-I	LTR/Copia
Copia-25_BG-I	LTR/Copia
Copia-25_BG-I	LTR/Copia
Copia-25_BG-I	LTR/Copia
Copia-25_BG-I	LTR/Copia
Copia-25_CQ-I	LTR/Copia
Copia-26_DR-I	LTR/Copia
Copia-26_NN-LTR	LTR/Copia
Copia-27_ALY-I	LTR/Copia
Copia-27B_ATr-LTR	LTR/Copia
Copia-27_FV-I	LTR/Copia
Copia-27_GR-I	LTR/Copia
Copia-27_LU-I	LTR/Copia
Copia-28_ALY-I	LTR/Copia
Copia-28_NN-I	LTR/Copia
Copia-2-I_BF	LTR/Copia
Copia-2_LH-I	LTR/Copia
Copia-2_MVPL-I	LTR/Copia
Copia-2_PPa-I	LTR/Copia
Copia-2_SCH-I	LTR/Copia
Copia-2_VA-I	LTR/Copia
Copia-2_VA-I	LTR/Copia
Copia-2_VA-I	LTR/Copia
Copia-2_VA-I	LTR/Copia
Copia-2_VA-I	LTR/Copia
Copia-2_VA-I	LTR/Copia
Copia-2_VA-I	LTR/Copia
Copia-2_VA-I	LTR/Copia
Copia-31_BG-I	LTR/Copia
Copia-31_BG-I	LTR/Copia
Copia-31_BG-I	LTR/Copia
Copia-32_LU-I	LTR/Copia
Copia-32_NN-I	LTR/Copia
Copia-33_BD-I	LTR/Copia
Copia-33_CCri-I	LTR/Copia
Copia-33_GM-I	LTR/Copia
Copia-33_GM-I	LTR/Copia
Copia-33_GM-I	LTR/Copia
Copia-33_GM-I	LTR/Copia
Copia-33_GM-I	LTR/Copia
Copia-33_MN-I	LTR/Copia
Copia-34_AIp-I	LTR/Copia
Copia-34-I_VV	LTR/Copia
Copia-35B_ATr-I	LTR/Copia
Copia-35_Mad-I	LTR/Copia
Copia-35_MN-I	LTR/Copia
Copia35-PTR_I	LTR/Copia
Copia-35_SB-I	LTR/Copia
Copia-36_Sit-I	LTR/Copia
Copia-38_ECa-I	LTR/Copia
Copia-38_NN-I	LTR/Copia
Copia-39_FV-I	LTR/Copia
Copia-39_ST-I	LTR/Copia
Copia-3_ATr-I	LTR/Copia
Copia-3_DGri-I	LTR/Copia
Copia-3_PPa-I	LTR/Copia
Copia-3_PPa-I	LTR/Copia
Copia-3_PSH-I	LTR/Copia
Copia-3_PSH-I	LTR/Copia
Copia-3_PSH-I	LTR/Copia
Copia-3_SCH-I	LTR/Copia
Copia-3_TA-I	LTR/Copia
Copia-41_AIp-I	LTR/Copia
Copia-41_ATr-I	LTR/Copia
Copia-41_BG-I	LTR/Copia
Copia-42_FV-I	LTR/Copia
Copia-42_FV-I	LTR/Copia
Copia-42_GR-I	LTR/Copia
Copia-42_SB-I	LTR/Copia
Copia-42_SB-I	LTR/Copia
Copia-44_BD-I	LTR/Copia
Copia-45_BG-I	LTR/Copia
Copia-45_BG-I	LTR/Copia
Copia-45_BG-I	LTR/Copia
Copia-45_BG-I	LTR/Copia
Copia-45_BG-I	LTR/Copia
Copia-45_BG-I	LTR/Copia
Copia-45_BG-I	LTR/Copia
Copia-45_ECa-I	LTR/Copia
Copia45-PTR_I	LTR/Copia
Copia-45_ST-I	LTR/Copia
Copia-46_BD-LTR	LTR/Copia
Copia-47_BD-I	LTR/Copia
Copia-47_MN-I	LTR/Copia
Copia-47_MN-I	LTR/Copia
Copia-47_ZM-I	LTR/Copia
Copia48-PTR_I	LTR/Copia
Copia-49_GR-I	LTR/Copia
Copia49-PTR_I	LTR/Copia
Copia-4_DGri-I	LTR/Copia
Copia-4_DGri-I	LTR/Copia
Copia-4_HV-LTR	LTR/Copia
Copia-4_HV-LTR	LTR/Copia
Copia-4_HV-LTR	LTR/Copia
Copia-4_SMo-I	LTR/Copia
Copia-4_XT-I	LTR/Copia
Copia-50_ECa-I	LTR/Copia
Copia-51_BRa-I	LTR/Copia
Copia-51_JC-I	LTR/Copia
Copia-52_BRa-I	LTR/Copia
Copia-52_ZM-I	LTR/Copia
Copia53-PTR_I	LTR/Copia
Copia-54_ST-I	LTR/Copia
Copia-55_ZM-I	LTR/Copia
Copia-58_BG-I	LTR/Copia
Copia-58_BG-I	LTR/Copia
Copia-58_BG-I	LTR/Copia
Copia-58_BG-I	LTR/Copia
Copia-58_BG-I	LTR/Copia
Copia-58_BG-I	LTR/Copia
Copia-58_PI-I	LTR/Copia
Copia-58_PI-I	LTR/Copia
Copia-59_SB-I	LTR/Copia
Copia-5_ADe-I	LTR/Copia
Copia-5_CP-I	LTR/Copia
Copia-5_DAn-I	LTR/Copia
Copia-60_MN-I	LTR/Copia
Copia-60_SB-I	LTR/Copia
Copia-61_BG-I	LTR/Copia
Copia-61_GM-I	LTR/Copia
Copia-61_GM-I	LTR/Copia
Copia-61_GM-I	LTR/Copia
Copia-61_GM-I	LTR/Copia
Copia-61_GM-I	LTR/Copia
Copia-61_GM-I	LTR/Copia
Copia-64_PT-I	LTR/Copia
Copia-65_SB-I	LTR/Copia
Copia-65_ZM-I	LTR/Copia
Copia-66_CCri-I	LTR/Copia
Copia-67_SB-I	LTR/Copia
Copia-68_BG-I	LTR/Copia
Copia-68_GM-I	LTR/Copia
Copia-69_CCri-I	LTR/Copia
Copia-6_ALY-I	LTR/Copia
Copia-6_BG-I	LTR/Copia
Copia-6_DPu-I	LTR/Copia
Copia-6_PR-I	LTR/Copia
Copia6-ZM_I	LTR/Copia
Copia-71_GM-I	LTR/Copia
Copia-72_CCri-I	LTR/Copia
Copia-72_ZM-I	LTR/Copia
Copia-73_AA-I	LTR/Copia
Copia-73_SB-I	LTR/Copia
Copia-74_MLP-I	LTR/Copia
Copia-77_CCri-I	LTR/Copia
Copia-77_Mad-I	LTR/Copia
Copia-77_PT-I	LTR/Copia
Copia-78_SB-I	LTR/Copia
Copia-79_ST-I	LTR/Copia
Copia-7_ADe-I	LTR/Copia
Copia-7_DPu-I	LTR/Copia
Copia-7_ES-I	LTR/Copia
Copia-7_ES-I	LTR/Copia
Copia-7_ES-I	LTR/Copia
Copia-7_ES-I	LTR/Copia
Copia-7_ES-I	LTR/Copia
Copia-7_ES-I	LTR/Copia
Copia-7_ES-I	LTR/Copia
Copia-7_ES-I	LTR/Copia
Copia-7_ES-I	LTR/Copia
Copia-7_ES-I	LTR/Copia
Copia-7_ES-I	LTR/Copia
Copia-7_ES-I	LTR/Copia
Copia-7_ES-I	LTR/Copia
Copia-7_ES-I	LTR/Copia
Copia-7_ES-I	LTR/Copia
Copia-7_ES-I	LTR/Copia
Copia-7_ES-I	LTR/Copia
Copia-7_ES-I	LTR/Copia
Copia-7_ES-I	LTR/Copia
Copia-7_ES-I	LTR/Copia
Copia-7_ES-I	LTR/Copia
Copia-7_PTc-I	LTR/Copia
Copia-7_PX-I	LTR/Copia
Copia-82_MN-I	LTR/Copia
Copia-83_PT-I	LTR/Copia
Copia-87B_CCri-I	LTR/Copia
Copia-87_CCri-I	LTR/Copia
Copia-87_CCri-I	LTR/Copia
Copia-87_GM-I	LTR/Copia
Copia-8_ADe-I	LTR/Copia
Copia-8_ADe-I	LTR/Copia
Copia-8_Ano-I	LTR/Copia
Copia-8_BG-I	LTR/Copia
Copia-8_BG-I	LTR/Copia
Copia-8_BG-I	LTR/Copia
Copia-8_BG-I	LTR/Copia
Copia-8_BG-I	LTR/Copia
Copia-8_BG-I	LTR/Copia
Copia-8_CPu-I	LTR/Copia
Copia-8_MN-I	LTR/Copia
Copia-8_RC-I	LTR/Copia
Copia-91_SB-I	LTR/Copia
Copia-92_ALY-I	LTR/Copia
Copia-92_ST-I	LTR/Copia
Copia-93_BRa-I	LTR/Copia
Copia-96_AA-I	LTR/Copia
Copia-97_SB-I	LTR/Copia
Copia-9_BRa-I	LTR/Copia
Copia-9_ECa-I	LTR/Copia
Copia-9_EPa-I	LTR/Copia
Copia-9_FV-I	LTR/Copia
Copia-9_FV-I	LTR/Copia
Copia-9_Mad-I	LTR/Copia
Gyp_I_MT	LTR/Gypsy
GYPSHAN3_I_MT	LTR/Gypsy
GYPSM1_I	LTR/Gypsy
Gypsy-101_ZM-LTR	LTR/Gypsy
Gypsy-103_MLP-I	LTR/Gypsy
Gypsy-103_MLP-I	LTR/Gypsy
Gypsy-105_SB-LTR	LTR/Gypsy
Gypsy-10_ALY-I	LTR/Gypsy
Gypsy-10_Cia-I	LTR/Gypsy
Gypsy-10_Crp-I	LTR/Gypsy
Gypsy-10_DBp-I	LTR/Gypsy
Gypsy-10_DRh-I	LTR/Gypsy
Gypsy-10_LBS-LTR	LTR/Gypsy
Gypsy-10_MN-I	LTR/Gypsy
Gypsy-10_MN-I	LTR/Gypsy
Gypsy-10_OD-I	LTR/Gypsy
Gypsy-115-I_DR	LTR/Gypsy
Gypsy-115_MLP-I	LTR/Gypsy
Gypsy-116-LTR_DR	LTR/Gypsy
Gypsy-116_ZM-I	LTR/Gypsy
Gypsy-117_MLP-I	LTR/Gypsy
Gypsy-11_ADe-I	LTR/Gypsy
Gypsy-11_CCO-I	LTR/Gypsy
Gypsy-11_DRh-I	LTR/Gypsy
Gypsy-11-I_CR	LTR/Gypsy
Gypsy11-I_DR	LTR/Gypsy
Gypsy-11_MN-I	LTR/Gypsy
Gypsy-11_PSo-I	LTR/Gypsy
Gypsy120-I_DR	LTR/Gypsy
Gypsy-121_SBi-I	LTR/Gypsy
Gypsy-122B_SBi-I	LTR/Gypsy
Gypsy-124_GM-I	LTR/Gypsy
Gypsy-128_GM-I	LTR/Gypsy
Gypsy-12_ADe-I	LTR/Gypsy
Gypsy-12_ATr-LTR	LTR/Gypsy
Gypsy-12_DEu-I	LTR/Gypsy
Gypsy-12_DPu-I	LTR/Gypsy
Gypsy-12F1_AMi-LTR	LTR/Gypsy
Gypsy-12-I_CR	LTR/Gypsy
Gypsy12-I_VC	LTR/Gypsy
Gypsy12-LTR_Dya	LTR/Gypsy
Gypsy-12_SB-I	LTR/Gypsy
Gypsy-130_GM-I	LTR/Gypsy
Gypsy-132_AA-I	LTR/Gypsy
Gypsy-132_AA-LTR	LTR/Gypsy
Gypsy134-LTR_DR	LTR/Gypsy
Gypsy-134_ZM-I	LTR/Gypsy
Gypsy-13_DEl-LTR	LTR/Gypsy
Gypsy-13_GA-I	LTR/Gypsy
Gypsy-13_GR-I	LTR/Gypsy
Gypsy-13_IS-I	LTR/Gypsy
Gypsy-13_LBS-I	LTR/Gypsy
Gypsy-13_PAb-I	LTR/Gypsy
Gypsy-13_SB-I	LTR/Gypsy
Gypsy-13_SB-I	LTR/Gypsy
Gypsy-13_SB-I	LTR/Gypsy
Gypsy-13_SMo-LTR	LTR/Gypsy
Gypsy-13_SMo-LTR	LTR/Gypsy
Gypsy-13_SMo-LTR	LTR/Gypsy
Gypsy-13_SMo-LTR	LTR/Gypsy
Gypsy-13_TA-I	LTR/Gypsy
Gypsy-13_TA-I	LTR/Gypsy
Gypsy-144_AA-I	LTR/Gypsy
Gypsy-144_ZM-I	LTR/Gypsy
Gypsy-14B_ATr-I	LTR/Gypsy
Gypsy-14B_ATr-LTR	LTR/Gypsy
Gypsy-14_DAn-I	LTR/Gypsy
Gypsy-14_DAn-I	LTR/Gypsy
Gypsy-14_DAn-I	LTR/Gypsy
Gypsy-14_DAn-I	LTR/Gypsy
Gypsy-14_DAn-I	LTR/Gypsy
Gypsy-14_DEl-I	LTR/Gypsy
Gypsy-14_FV-I	LTR/Gypsy
Gypsy14-LTR_Dpse	LTR/Gypsy
Gypsy-14_NN-I	LTR/Gypsy
Gypsy-14_SB-I	LTR/Gypsy
Gypsy-14_SB-I	LTR/Gypsy
Gypsy-14_SCH-I	LTR/Gypsy
Gypsy-14_SMo-I	LTR/Gypsy
Gypsy-152_ZM-I	LTR/Gypsy
Gypsy-15_BG-I	LTR/Gypsy
Gypsy-15_BRa-I	LTR/Gypsy
Gypsy-15_DRh-I	LTR/Gypsy
Gypsy-15_GA-I	LTR/Gypsy
Gypsy15-I_VC	LTR/Gypsy
Gypsy-15_LBS-I	LTR/Gypsy
Gypsy15-LTR_Dpse	LTR/Gypsy
Gypsy-15_MN-I	LTR/Gypsy
Gypsy-15_SSa-I	LTR/Gypsy
Gypsy-166_AA-I	LTR/Gypsy
Gypsy-167_ZM-I	LTR/Gypsy
Gypsy-16_AMi-LTR	LTR/Gypsy
Gypsy-16_CFl-I	LTR/Gypsy
Gypsy-16_CPB-I	LTR/Gypsy
Gypsy-16_DPu-I	LTR/Gypsy
Gypsy-16_FV-I	LTR/Gypsy
Gypsy-16-I_NVi	LTR/Gypsy
Gypsy-16-I_NVi	LTR/Gypsy
Gypsy-16_LBS-I	LTR/Gypsy
Gypsy-16_OS-I	LTR/Gypsy
Gypsy-16_RO-I	LTR/Gypsy
Gypsy-16_Sit-I	LTR/Gypsy
Gypsy-16_Sit-I	LTR/Gypsy
Gypsy-177_ZM-I	LTR/Gypsy
Gypsy-17_Adi-I	LTR/Gypsy
Gypsy-17_CCri-I	LTR/Gypsy
Gypsy-17_CPB-I	LTR/Gypsy
Gypsy-17_CPB-I	LTR/Gypsy
Gypsy-17_DEl-I	LTR/Gypsy
Gypsy-17-I_BF	LTR/Gypsy
Gypsy-17-I_DR	LTR/Gypsy
Gypsy-17_LCh-I	LTR/Gypsy
Gypsy-17_PAb-I	LTR/Gypsy
Gypsy-17_PGr-I	LTR/Gypsy
Gypsy-17_SCH-I	LTR/Gypsy
Gypsy-17_Sit-I	LTR/Gypsy
Gypsy-17_XT-I	LTR/Gypsy
Gypsy-18_ADe-I	LTR/Gypsy
Gypsy-18_CCri-I	LTR/Gypsy
Gypsy-18_DAn-I	LTR/Gypsy
Gypsy-18_FV-I	LTR/Gypsy
Gypsy18-I_CR	LTR/Gypsy
Gypsy18-I_CR	LTR/Gypsy
Gypsy-18_IS-I	LTR/Gypsy
Gypsy-18_NN-I	LTR/Gypsy
Gypsy-18_NN-I	LTR/Gypsy
Gypsy-194_ZM-I	LTR/Gypsy
Gypsy-195_DR-I	LTR/Gypsy
Gypsy-196_AA-I	LTR/Gypsy
Gypsy-199_ZM-I	LTR/Gypsy
Gypsy-199_ZM-I	LTR/Gypsy
Gypsy-19_Ano-LTR	LTR/Gypsy
Gypsy-19_CT-I	LTR/Gypsy
Gypsy-19_DPu-I	LTR/Gypsy
Gypsy-19_DTa-I	LTR/Gypsy
Gypsy-19_GA-I	LTR/Gypsy
Gypsy-19_LCh-I	LTR/Gypsy
Gypsy-19_SB-I	LTR/Gypsy
Gypsy-1_AC-I	LTR/Gypsy
Gypsy-1_AC-I	LTR/Gypsy
Gypsy-1_AC-I	LTR/Gypsy
Gypsy-1_AC-I	LTR/Gypsy
Gypsy-1_AC-I	LTR/Gypsy
Gypsy-1_AC-I	LTR/Gypsy
Gypsy-1_AC-I	LTR/Gypsy
Gypsy-1_AC-I	LTR/Gypsy
Gypsy-1_AC-I	LTR/Gypsy
Gypsy-1_AC-I	LTR/Gypsy
Gypsy-1_AC-I	LTR/Gypsy
Gypsy-1_ADe-I	LTR/Gypsy
Gypsy-1_ARO-I	LTR/Gypsy
Gypsy-1_BFB-I	LTR/Gypsy
Gypsy-1_CCO-I	LTR/Gypsy
Gypsy-1_CGi-I	LTR/Gypsy
Gypsy-1_CMe-I	LTR/Gypsy
Gypsy-1_CMe-I	LTR/Gypsy
Gypsy-1_CMe-I	LTR/Gypsy
Gypsy-1_CMe-I	LTR/Gypsy
Gypsy-1_CMe-LTR	LTR/Gypsy
Gypsy1-I_AO	LTR/Gypsy
Gypsy1-I_AO	LTR/Gypsy
Gypsy1-I_Dmoj	LTR/Gypsy
Gypsy-1-I_DP	LTR/Gypsy
Gypsy-1-I_MH	LTR/Gypsy
Gypsy-1-I_PI	LTR/Gypsy
Gypsy-1_PSo-I	LTR/Gypsy
Gypsy-1_PSt-I	LTR/Gypsy
Gypsy-1_RGl-I	LTR/Gypsy
Gypsy-1_SCH-I	LTR/Gypsy
Gypsy-202_ZM-I	LTR/Gypsy
Gypsy-205_AA-I	LTR/Gypsy
Gypsy-20_ATr-LTR	LTR/Gypsy
Gypsy-20_BG-I	LTR/Gypsy
Gypsy-20_CCri-I	LTR/Gypsy
Gypsy20-I_SP	LTR/Gypsy
Gypsy-20_LBS-LTR	LTR/Gypsy
Gypsy-20_SB-I	LTR/Gypsy
Gypsy-20_SI-I	LTR/Gypsy
Gypsy-21_Ano-LTR	LTR/Gypsy
Gypsy-21_OS-I	LTR/Gypsy
Gypsy-21_PAb-I	LTR/Gypsy
Gypsy-21_PBa-LTR	LTR/Gypsy
Gypsy21-PTR_I	LTR/Gypsy
Gypsy-21_SB-I	LTR/Gypsy
Gypsy-22_ATr-I	LTR/Gypsy
Gypsy-22_DYa-I	LTR/Gypsy
Gypsy-22_SB-I	LTR/Gypsy
Gypsy-22_SB-I	LTR/Gypsy
Gypsy-22_SB-I	LTR/Gypsy
Gypsy-231_DR-LTR	LTR/Gypsy
Gypsy-23_BD-I	LTR/Gypsy
Gypsy-23_CT-I	LTR/Gypsy
Gypsy-23_DEl-I	LTR/Gypsy
Gypsy-23_GR-I	LTR/Gypsy
Gypsy-23_OS-LTR	LTR/Gypsy
Gypsy-23_ST-I	LTR/Gypsy
Gypsy-23_ST-I	LTR/Gypsy
Gypsy-24_ATr-I	LTR/Gypsy
Gypsy-24_BD-I	LTR/Gypsy
Gypsy-24B_OS-LTR	LTR/Gypsy
Gypsy-24_CGi-LTR	LTR/Gypsy
Gypsy-24_CSa-I	LTR/Gypsy
Gypsy-24_PGr-I	LTR/Gypsy
Gypsy-24_PR-I	LTR/Gypsy
Gypsy-24_PSo-LTR	LTR/Gypsy
Gypsy-24_RC-I	LTR/Gypsy
Gypsy-251_DR-I	LTR/Gypsy
Gypsy-25_DEl-I	LTR/Gypsy
Gypsy-25_GA-I	LTR/Gypsy
Gypsy-25-I_NV	LTR/Gypsy
Gypsy-25_LMi-I	LTR/Gypsy
Gypsy-25_LSal-I	LTR/Gypsy
Gypsy-25_OS-I	LTR/Gypsy
Gypsy-26_PSo-I	LTR/Gypsy
Gypsy-26_VV-LTR	LTR/Gypsy
Gypsy-279_AA-I	LTR/Gypsy
Gypsy-27_ADe-I	LTR/Gypsy
Gypsy-27_ATr-I	LTR/Gypsy
Gypsy-27_CQ-I	LTR/Gypsy
Gypsy-27_DP-I	LTR/Gypsy
Gypsy-27_GR-I	LTR/Gypsy
Gypsy-27_LSal-I	LTR/Gypsy
Gypsy-27_MLP-I	LTR/Gypsy
Gypsy-27_OS-I	LTR/Gypsy
Gypsy-27_PSo-I	LTR/Gypsy
Gypsy-284_AA-I	LTR/Gypsy
Gypsy-28_ADe-I	LTR/Gypsy
Gypsy-28_BRa-I	LTR/Gypsy
Gypsy-28_GA-I	LTR/Gypsy
Gypsy-28_GM-I	LTR/Gypsy
Gypsy-28-I_DR	LTR/Gypsy
Gypsy-28_SB-I	LTR/Gypsy
Gypsy-28_SSa-LTR	LTR/Gypsy
Gypsy-28_VV-I	LTR/Gypsy
Gypsy-29-I_DR	LTR/Gypsy
Gypsy-29-I_NV	LTR/Gypsy
Gypsy-29_LMi-I	LTR/Gypsy
Gypsy-29_LMi-I	LTR/Gypsy
Gypsy-29_VV-I	LTR/Gypsy
Gypsy-2_AM-I	LTR/Gypsy
Gypsy-2_BM-I	LTR/Gypsy
Gypsy-2_CCri-LTR	LTR/Gypsy
Gypsy-2_CQ-I	LTR/Gypsy
Gypsy-2_GDe-I	LTR/Gypsy
Gypsy2-HV_I	LTR/Gypsy
GYPSY2-I_AG	LTR/Gypsy
GYPSY2-I_MT	LTR/Gypsy
Gypsy-2_IS-I	LTR/Gypsy
Gypsy2-I_SP	LTR/Gypsy
Gypsy2-I_VC	LTR/Gypsy
Gypsy-2_PAb-I	LTR/Gypsy
Gypsy-2_PCR-I	LTR/Gypsy
Gypsy-2_PPI-I	LTR/Gypsy
Gypsy-2_PPI-I	LTR/Gypsy
Gypsy-2_PPI-I	LTR/Gypsy
Gypsy-2_PPI-I	LTR/Gypsy
Gypsy-30_BD-I	LTR/Gypsy
Gypsy-30_PSo-I	LTR/Gypsy
Gypsy-30_SP-I	LTR/Gypsy
Gypsy-30_SP-I	LTR/Gypsy
Gypsy-31_ADe-I	LTR/Gypsy
Gypsy-31_AIp-I	LTR/Gypsy
Gypsy-31_DEl-I	LTR/Gypsy
Gypsy-31_DYa-I	LTR/Gypsy
Gypsy-31_GA-I	LTR/Gypsy
Gypsy-31-LTR_DR	LTR/Gypsy
Gypsy-31-LTR_DR	LTR/Gypsy
Gypsy-31-LTR_DR	LTR/Gypsy
Gypsy-31_PIT-I	LTR/Gypsy
Gypsy-31_PIT-I	LTR/Gypsy
Gypsy-31_ST-LTR	LTR/Gypsy
Gypsy-31_ST-LTR	LTR/Gypsy
Gypsy-32_ADe-I	LTR/Gypsy
Gypsy-32_ADe-I	LTR/Gypsy
Gypsy-32_CT-I	LTR/Gypsy
Gypsy-32_GM-I	LTR/Gypsy
GYPSY32-I_AG	LTR/Gypsy
Gypsy-32-I_NVi	LTR/Gypsy
Gypsy-32_PIT-I	LTR/Gypsy
Gypsy-33_ADe-I	LTR/Gypsy
Gypsy-33_ST-I	LTR/Gypsy
Gypsy-34-I_DR	LTR/Gypsy
Gypsy-34_NVi-I	LTR/Gypsy
Gypsy-34_ST-I	LTR/Gypsy
Gypsy34-ZM_I	LTR/Gypsy
Gypsy-35_GA-I	LTR/Gypsy
Gypsy-35_Mad-LTR	LTR/Gypsy
Gypsy-36_DWil-I	LTR/Gypsy
Gypsy-36_GM-I	LTR/Gypsy
Gypsy-36_PAb-I	LTR/Gypsy
Gypsy-36_PSo-I	LTR/Gypsy
Gypsy-36_SB-I	LTR/Gypsy
Gypsy-36_SB-I	LTR/Gypsy
Gypsy-37_ATr-LTR	LTR/Gypsy
Gypsy-37_BG-I	LTR/Gypsy
GYPSY37-I_AG	LTR/Gypsy
GYPSY37-I_AG	LTR/Gypsy
Gypsy-37-I_NV	LTR/Gypsy
Gypsy-37_NVi-I	LTR/Gypsy
Gypsy-38_DPu-I	LTR/Gypsy
Gypsy-39_BRa-I	LTR/Gypsy
Gypsy-39_DPu-I	LTR/Gypsy
Gypsy-3_AC-I	LTR/Gypsy
Gypsy-3_BDi-I	LTR/Gypsy
Gypsy-3_ES-I	LTR/Gypsy
Gypsy-3_PBa-I	LTR/Gypsy
Gypsy-3_PCR-I	LTR/Gypsy
Gypsy-3_Sit-I	LTR/Gypsy
Gypsy-3_Trm-I	LTR/Gypsy
Gypsy-40_GR-LTR	LTR/Gypsy
Gypsy-40_Mad-I	LTR/Gypsy
Gypsy-40_Mad-I	LTR/Gypsy
Gypsy-40_Mad-I	LTR/Gypsy
Gypsy40-ZM_I	LTR/Gypsy
Gypsy40-ZM_I	LTR/Gypsy
Gypsy-41_GM-I	LTR/Gypsy
Gypsy-41_LMi-I	LTR/Gypsy
Gypsy-41_OD-I	LTR/Gypsy
Gypsy-42_PIT-I	LTR/Gypsy
Gypsy-42_PIT-I	LTR/Gypsy
Gypsy-43_CQ-LTR	LTR/Gypsy
Gypsy-43_GM-I	LTR/Gypsy
Gypsy-43_Mad-I	LTR/Gypsy
Gypsy-43_OS-LTR	LTR/Gypsy
Gypsy-43_OS-LTR	LTR/Gypsy
Gypsy-46_ATr-LTR	LTR/Gypsy
Gypsy-46_GM-I	LTR/Gypsy
Gypsy-46_Mad-I	LTR/Gypsy
Gypsy-46_PIT-I	LTR/Gypsy
Gypsy-46_SB-I	LTR/Gypsy
Gypsy-4_ADe-I	LTR/Gypsy
Gypsy-4_Adi-I	LTR/Gypsy
Gypsy-4_ALY-I	LTR/Gypsy
Gypsy-4_BG-I	LTR/Gypsy
Gypsy-4_BG-I	LTR/Gypsy
Gypsy-4_CCO-I	LTR/Gypsy
Gypsy-4_CCO-I	LTR/Gypsy
Gypsy-4-I_AF	LTR/Gypsy
Gypsy4-I_AP	LTR/Gypsy
Gypsy-4-I_BF	LTR/Gypsy
Gypsy-4-I_CR	LTR/Gypsy
Gypsy-4_LG-I	LTR/Gypsy
Gypsy-4-LTR_TA	LTR/Gypsy
Gypsy-4_PBa-I	LTR/Gypsy
Gypsy-4_PIT-I	LTR/Gypsy
Gypsy-50_GA-LTR	LTR/Gypsy
Gypsy-50_GA-LTR	LTR/Gypsy
Gypsy-50_GA-LTR	LTR/Gypsy
Gypsy-50_GA-LTR	LTR/Gypsy
Gypsy-50_GA-LTR	LTR/Gypsy
Gypsy-50_GA-LTR	LTR/Gypsy
Gypsy-50_GR-I	LTR/Gypsy
Gypsy-51_AA-I	LTR/Gypsy
Gypsy-51_PAb-I	LTR/Gypsy
Gypsy-52_CCri-I	LTR/Gypsy
Gypsy-52_Mad-I	LTR/Gypsy
Gypsy-53_CGi-I	LTR/Gypsy
Gypsy-53_GR-I	LTR/Gypsy
Gypsy54-LTR_DR	LTR/Gypsy
Gypsy-55_CGi-I	LTR/Gypsy
Gypsy-55_CGi-I	LTR/Gypsy
GYPSY55-I_AG	LTR/Gypsy
GYPSY55-I_AG	LTR/Gypsy
GYPSY55-I_AG	LTR/Gypsy
GYPSY55-I_AG	LTR/Gypsy
Gypsy55-ZM_I	LTR/Gypsy
Gypsy-56_BG-I	LTR/Gypsy
Gypsy-56_GA-I	LTR/Gypsy
Gypsy56-I_DR	LTR/Gypsy
Gypsy-57_DEl-I	LTR/Gypsy
Gypsy57-LTR_DR	LTR/Gypsy
Gypsy-57_PAb-I	LTR/Gypsy
Gypsy-58_BG-I	LTR/Gypsy
Gypsy-59_PAb-I	LTR/Gypsy
Gypsy-5_BD-I	LTR/Gypsy
Gypsy-5_BDi-I	LTR/Gypsy
Gypsy-5D_CCri-I	LTR/Gypsy
Gypsy-5_DPu-I	LTR/Gypsy
Gypsy-5E_CCri-I	LTR/Gypsy
Gypsy-5_HV-I	LTR/Gypsy
Gypsy-5_JC-I	LTR/Gypsy
Gypsy-5_JC-I	LTR/Gypsy
Gypsy-5_PMar-I	LTR/Gypsy
Gypsy-5_SLL-I	LTR/Gypsy
Gypsy-615_AA-I	LTR/Gypsy
Gypsy-615_AA-I	LTR/Gypsy
GYPSY61-I_AG	LTR/Gypsy
GYPSY61-I_AG	LTR/Gypsy
GYPSY61-I_AG	LTR/Gypsy
GYPSY61-I_AG	LTR/Gypsy
Gypsy-61_MLP-I	LTR/Gypsy
Gypsy-62_BG-LTR	LTR/Gypsy
Gypsy-62_BG-LTR	LTR/Gypsy
Gypsy-62_BG-LTR	LTR/Gypsy
Gypsy-62_BG-LTR	LTR/Gypsy
Gypsy-62_BG-LTR	LTR/Gypsy
Gypsy-62_BG-LTR	LTR/Gypsy
Gypsy-62_BG-LTR	LTR/Gypsy
Gypsy-62_BG-LTR	LTR/Gypsy
Gypsy-62-I_NV	LTR/Gypsy
Gypsy-63_CQ-I	LTR/Gypsy
Gypsy-63_PAb-I	LTR/Gypsy
Gypsy63-ZM_I	LTR/Gypsy
Gypsy-65_PIT-I	LTR/Gypsy
Gypsy-65_PIT-I	LTR/Gypsy
Gypsy-65_PIT-I	LTR/Gypsy
Gypsy-67_MLP-I	LTR/Gypsy
Gypsy-67_PM-I	LTR/Gypsy
GYPSY68-I_AG	LTR/Gypsy
Gypsy-68_PIT-I	LTR/Gypsy
Gypsy-69_LMi-I	LTR/Gypsy
Gypsy-6_Adi-I	LTR/Gypsy
Gypsy-6_Adi-I	LTR/Gypsy
Gypsy-6_AEc-LTR	LTR/Gypsy
Gypsy-6_Cia-I	LTR/Gypsy
Gypsy-6_DEl-I	LTR/Gypsy
Gypsy-6_DEl-I	LTR/Gypsy
Gypsy-6_DEu-I	LTR/Gypsy
Gypsy-6_EPa-I	LTR/Gypsy
Gypsy-6_GR-I	LTR/Gypsy
Gypsy6-LTR_Dmoj	LTR/Gypsy
Gypsy-6_PPa-I	LTR/Gypsy
Gypsy-6_TC-I	LTR/Gypsy
Gypsy-70_LMi-I	LTR/Gypsy
Gypsy-71_CCri-I	LTR/Gypsy
Gypsy-71_CGi-I	LTR/Gypsy
Gypsy-71_CGi-I	LTR/Gypsy
Gypsy71-I_DR	LTR/Gypsy
Gypsy-71M_CCri-I	LTR/Gypsy
Gypsy-72_SB-I	LTR/Gypsy
Gypsy-72_SB-I	LTR/Gypsy
Gypsy-73G_CCri-I	LTR/Gypsy
Gypsy-74_AA-I	LTR/Gypsy
Gypsy-74_CCri-I	LTR/Gypsy
Gypsy-74_GM-I	LTR/Gypsy
Gypsy74-I_DR	LTR/Gypsy
Gypsy-75_CCri-I	LTR/Gypsy
Gypsy-76_CGi-I	LTR/Gypsy
Gypsy-7_ATr-I	LTR/Gypsy
Gypsy-7_CCri-I	LTR/Gypsy
Gypsy-7_CPu-I	LTR/Gypsy
Gypsy-7_DPu-I	LTR/Gypsy
Gypsy-7_DPu-I	LTR/Gypsy
GYPSY7-I_AG	LTR/Gypsy
Gypsy-7-I_BF	LTR/Gypsy
Gypsy-7_LSal-I	LTR/Gypsy
Gypsy-7_PIT-I	LTR/Gypsy
Gypsy-7_SCH-I	LTR/Gypsy
Gypsy-7_SCH-I	LTR/Gypsy
Gypsy-7_XT-I	LTR/Gypsy
Gypsy-80-I_ZM	LTR/Gypsy
Gypsy82-LTR_Dr	LTR/Gypsy
Gypsy82-LTR_Dr	LTR/Gypsy
Gypsy82-LTR_Dr	LTR/Gypsy
Gypsy-82_PAb-I	LTR/Gypsy
Gypsy-83_PAb-I	LTR/Gypsy
Gypsy-84_AA-I	LTR/Gypsy
Gypsy-85_CPB-LTR	LTR/Gypsy
Gypsy-85_PAb-I	LTR/Gypsy
Gypsy-86_MLP-I	LTR/Gypsy
Gypsy-8_ATr-LTR	LTR/Gypsy
Gypsy-8_BRa-I	LTR/Gypsy
Gypsy-8_BRa-I	LTR/Gypsy
Gypsy-8_CH	LTR/Gypsy
Gypsy-8_CPu-I	LTR/Gypsy
Gypsy-8_DBp-I	LTR/Gypsy
Gypsy-8_EPa-I	LTR/Gypsy
Gypsy-8_GA-I	LTR/Gypsy
Gypsy-8-I_CR	LTR/Gypsy
Gypsy-8-I_CR	LTR/Gypsy
Gypsy8-I_Dpse	LTR/Gypsy
Gypsy8-I_Dpse	LTR/Gypsy
Gypsy8-I_Dpse	LTR/Gypsy
Gypsy8-I_Dpse	LTR/Gypsy
Gypsy8-I_Dpse	LTR/Gypsy
Gypsy8-I_Dpse	LTR/Gypsy
Gypsy-8_MMa-I	LTR/Gypsy
Gypsy-8_PBa-I	LTR/Gypsy
Gypsy-8_PTri-I	LTR/Gypsy
Gypsy91-I_DR	LTR/Gypsy
Gypsy94-I_DR	LTR/Gypsy
Gypsy-96_CCri-I	LTR/Gypsy
Gypsy-97_AA-I	LTR/Gypsy
Gypsy-97_CQ-I	LTR/Gypsy
Gypsy98-I_Dr	LTR/Gypsy
Gypsy-9_BG-I	LTR/Gypsy
Gypsy-9_CCO-I	LTR/Gypsy
Gypsy-9_DMoj-I	LTR/Gypsy
Gypsy-9_DPu-I	LTR/Gypsy
Gypsy-9_DPu-I	LTR/Gypsy
Gypsy-9_DPu-I	LTR/Gypsy
Gypsy-9_DPu-I	LTR/Gypsy
Gypsy-9_DPu-I	LTR/Gypsy
Gypsy-9_LG-I	LTR/Gypsy
Gypsy-9_LMi-I	LTR/Gypsy
Gypsy-9_PX-I	LTR/Gypsy
Gypsy-9_SMo-I	LTR/Gypsy
Gypsy-9_TCa-I	LTR/Gypsy
Gypsy-N129_SBi-I	LTR/Gypsy
HAL1_SS	SINE
HalSINE1	SINE
HARB-10_OS	DNA element
HARB-2_ALy	DNA element
HARB3_ZM	DNA element
HARB-4N1_Mad	DNA element
HARB-4N1_Mad	DNA element
PIF_Harbinger-1_PI	DNA element
Harbinger-12_CCri	DNA element
Harbinger-14_CCri	DNA element
Harbinger-1_MLP	DNA element
Harbinger-20_CCri	DNA element
Harbinger-21_CCri	DNA element
Harbinger2-1_NV	DNA element
Harbinger2-2_NV	DNA element
Harbinger-28_CCri	DNA element
Harbinger-2D_CPB	DNA element
Harbinger2N_TP	DNA element
Harbinger2N_TP	DNA element
Harbinger2N_TP	DNA element
Harbinger2N_TP	DNA element
Harbinger2N_TP	DNA element
Harbinger2N_TP	DNA element
Harbinger-43_CCri	DNA element
Harbinger-4_HM	DNA element
Harbinger-50_CCri	DNA element
Harbinger-57_CCri	DNA element
Harbinger-73_CCri	DNA element
Harbinger-73_CCri	DNA element
Harbinger-7_PGr	DNA element
Harbinger-7_PGr	DNA element
Harbinger-8_DR	DNA element
Harbinger-8_PGr	DNA element
Harbinger-9_PI	DNA element
Harbinger-9_PSt	DNA element
Harbinger-N12_OS	DNA element
Harbinger-N17_DR	DNA element
Harbinger-N17_DR	DNA element
Harbinger-N29_OS	DNA element
Harbinger-N2_SP	DNA element
Harbinger-N74_OS	DNA element
Harbinger-N7D_OS	DNA element
hAT-10_ATr	DNA element
HAT-10_Mad	DNA element
hAT-11N1_SSa	DNA element
hAT-12_ATr	DNA element
hAT-12_ATr	DNA element
hAT-12_ATr	DNA element
hAT-12_ATr	DNA element
hAT-12_HRo	DNA element
hAT-12_VVi	DNA element
hAT-14_HRo	DNA element
hAT-15_HRo	DNA element
hAT-18_ZM	DNA element
hAT-1960_Ami	DNA element
hAT-1_Cglob	DNA element
hAT-1_Cglob	DNA element
hAT-1_Cglob	DNA element
hAT-1_Cglob	DNA element
hAT-1_Cglob	DNA element
hAT-1_Cglob	DNA element
HAT1_DR	DNA element
hAT-1_EHux	DNA element
hAT-1_ESi	DNA element
hAT-1_NN	DNA element
hAT-1_PPe	DNA element
hAT-1_PSt	DNA element
hAT-20_Mad	DNA element
hAT-22_LCh	DNA element
hAT-24_CPB	DNA element
hAT-24_DR	DNA element
hAT-25_LCh	DNA element
hAT-2_PSt	DNA element
hAT-30_LCh	DNA element
hAT-30N1_DR	DNA element
hAT-40_HM	DNA element
hAT-4_CCri	DNA element
hAT-4_CCri	DNA element
hAT-4_CCri	DNA element
hAT-4_CCri	DNA element
hAT-4_CCri	DNA element
hAT-4_CCri	DNA element
HAT-4_Mad	DNA element
HAT-4N1_Mad	DNA element
hAT-4_OS	DNA element
hAT-4_PBa	DNA element
hAT-4_PBa	DNA element
hAT5_AQ	DNA element
hAT5_AQ	DNA element
hAT-5_DRh	DNA element
hAT6-1_SP	DNA element
hAT6-2_NV	DNA element
hAT6-2_SP	DNA element
hAT-6_CCri	DNA element
hAT-6_JC	DNA element
hAT-7N2_PM	DNA element
hAT-9_DBp	DNA element
hAT-9_LMi	DNA element
hAT-9_LMi	DNA element
hATa-1_EHux	DNA element
hATa-1_EHux	DNA element
hATa-1_EHux	DNA element
hATm-12_HM	DNA element
hATm-1_CS	DNA element
hATm-52_HM	DNA element
hATm-57_HM	DNA element
HATN11_DR	DNA element
HATN11_DR	DNA element
hAT-N159_DR	DNA element
hAT-N159_DR	DNA element
hAT-N159_DR	DNA element
hAT-N159_DR	DNA element
hAT-N16_Crp	DNA element
hAT-N16_Crp	DNA element
HATN16_DR	DNA element
HATN17_DR	DNA element
hAT-N182_DR	DNA element
hAT-N185B_DR	DNA element
hAT-N185C_DR	DNA element
hAT-N196_DR	DNA element
hAT-N196_DR	DNA element
hAT-N1_BF	DNA element
hAT-N202_DR	DNA element
hAT-N39_DR	DNA element
hAT-N40_OS	DNA element
hAT-N47C_DR	DNA element
hAT-N48B_DR	DNA element
hAT-N48B_DR	DNA element
hAT-N48B_DR	DNA element
hAT-N48B_DR	DNA element
hAT-N48B_DR	DNA element
hAT-N48B_DR	DNA element
hAT-N48B_DR	DNA element
hAT-N48B_DR	DNA element
hAT-N48C_DR	DNA element
hAT-N48C_DR	DNA element
hAT-N48C_DR	DNA element
hAT-N48C_DR	DNA element
hAT-N48C_DR	DNA element
hAT-N4_ALy	DNA element
hAT-N4_ALy	DNA element
hAT-N4_ALy	DNA element
hAT-N4_ALy	DNA element
hAT-N4_ALy	DNA element
hAT-N4_ALy	DNA element
hAT-N4_ALy	DNA element
hAT-N4_ALy	DNA element
hAT-N4_ALy	DNA element
hAT-N4_ALy	DNA element
hAT-N4_ALy	DNA element
hAT-N4_ALy	DNA element
hAT-N4_ALy	DNA element
hAT-N4_ALy	DNA element
hAT-N4_ALy	DNA element
hAT-N4_ALy	DNA element
hAT-N4_ALy	DNA element
hAT-N4_ALy	DNA element
hAT-N4_ALy	DNA element
hAT-N4_ALy	DNA element
hAT-N4_ALy	DNA element
hAT-N4_ALy	DNA element
hAT-N4_ALy	DNA element
hAT-N4_ALy	DNA element
hAT-N4_ALy	DNA element
hAT-N4_ALy	DNA element
hAT-N4_ALy	DNA element
hAT-N4_ALy	DNA element
hAT-N4_ALy	DNA element
hAT-N4_ALy	DNA element
hAT-N4_ALy	DNA element
hAT-N4_ALy	DNA element
hAT-N4_ALy	DNA element
hAT-N4_ALy	DNA element
hAT-N4_ALy	DNA element
hAT-N4_ALy	DNA element
hAT-N4_ALy	DNA element
hAT-N4_ALy	DNA element
hAT-N4_ALy	DNA element
hAT-N4_ALy	DNA element
hAT-N4_ALy	DNA element
hAT-N4_ALy	DNA element
hAT-N4_ALy	DNA element
hAT-N4_ALy	DNA element
hAT-N4_ALy	DNA element
hAT-N4_ALy	DNA element
hAT-N4_ALy	DNA element
hAT-N4_ALy	DNA element
hAT-N4_ALy	DNA element
hAT-N4_ALy	DNA element
hAT-N4_ALy	DNA element
hAT-N4_ALy	DNA element
hAT-N4_ALy	DNA element
hAT-N4_ALy	DNA element
hAT-N4_ALy	DNA element
hAT-N4_ALy	DNA element
hAT-N4_ALy	DNA element
hAT-N4_ALy	DNA element
hAT-N4_ALy	DNA element
hAT-N4_ALy	DNA element
hAT-N53_DR	DNA element
hAT-N5888_Crp	DNA element
hAT-N5888_Crp	DNA element
hAT-N58_CPB	DNA element
hAT-N6_ACar	DNA element
hAT-N83_DR	DNA element
hAT-NA5_AM	DNA element
hATw-1_CCo	DNA element
Helena_Ds	LINE-like
Helitron-12_OS	DNA element
HELITRON1_AG	DNA element
HELITRON1_AG	DNA element
HELITRON1_AG	DNA element
HELITRON1_AG	DNA element
Helitron-1_ALy	DNA element
Helitron1_BF	DNA element
Helitron-1_CRe	DNA element
Helitron-1_CRe	DNA element
Helitron-1_CRe	DNA element
Helitron-1_CRe	DNA element
Helitron-1_CRe	DNA element
Helitron-1_CRe	DNA element
Helitron-1_CRe	DNA element
Helitron-1_CRe	DNA element
Helitron-1_CRe	DNA element
Helitron-1_CRe	DNA element
Helitron-1_Mad	DNA element
Helitron-1_OL	DNA element
Helitron-1_OL	DNA element
Helitron-1_XT	DNA element
Helitron1_ZM	DNA element
HELITRON2	DNA element
Helitron-2_AMi	DNA element
Helitron-2_CRe	DNA element
Helitron-2_CRe	DNA element
Helitron-2_CRe	DNA element
Helitron-2_CRe	DNA element
Helitron-2_SMo	DNA element
Helitron-2_SP	DNA element
Helitron-3_CGi	DNA element
Helitron-3_FV	DNA element
Helitron-3N2_PM	DNA element
Helitron-3N2_PM	DNA element
Helitron-3_ZM	DNA element
Helitron-3_ZM	DNA element
Helitron-4_CRe	DNA element
Helitron-4N1_SMo	DNA element
Helitron-6_ALy	DNA element
Helitron-6_ALy	DNA element
Helitron-6_ALy	DNA element
Helitron-6_ALy	DNA element
Helitron-7_CCri	DNA element
Helitron-9_CGi	DNA element
Helitron-9_CGi	DNA element
Helitron-like-11_Hmel	DNA element
Helitron-N124_OS	DNA element
Helitron-N12C_OS	DNA element
Helitron-N134_OS	DNA element
Helitron-N134_OS	DNA element
Helitron-N139_OS	DNA element
Helitron-N151_OS	DNA element
Helitron-N156_OS	DNA element
Helitron-N180_OS	DNA element
Helitron-N180_OS	DNA element
HelitronN-1_DPe	DNA element
HelitronN-1_DPe	DNA element
Helitron-N1_HSal	DNA element
Helitron-N1_HSal	DNA element
Helitron-N1_LMi	DNA element
Helitron-N21_OS	DNA element
Helitron-N2d_CGi	DNA element
Helitron-N34_CGi	DNA element
Helitron-N39_OS	DNA element
Helitron-N3_ZM	DNA element
Helitron-N55C_OS	DNA element
Helitron-N5_DR	DNA element
Helitron-N68_OS	DNA element
Helitron-N78B_OS	DNA element
I-1_AA	LINE-like
I-1_DP	LINE-like
I-3_LMi	LINE-like
I-48_AAe	LINE-like
I-4_DBp	LINE-like
I-5_AO	LINE-like
I-5_AO	LINE-like
I-5_AO	LINE-like
I-5_AO	LINE-like
I-5_AO	LINE-like
I-5_AO	LINE-like
I-5_AO	LINE-like
I-5_AO	LINE-like
I-5_AO	LINE-like
I-5_AO	LINE-like
I-5_AO	LINE-like
I-5_AO	LINE-like
I-5_AO	LINE-like
I-5_AO	LINE-like
I-5_AO	LINE-like
I-5_AO	LINE-like
I-5_AO	LINE-like
I-68_AAe	LINE-like
I-78_AAe	LINE-like
I-7_AAe	LINE-like
I_Ele10	LINE-like
I_Ele17	LINE-like
I_Ele24	LINE-like
Jockey	LINE-like
Jockey-1_DBp	LINE-like
Jockey-2_DF	LINE-like
Jockey-2_DGri	LINE-like
Jockey-2_DRh	LINE-like
Jockey-3_DGri	LINE-like
Jockey-3_DGri	LINE-like
Jockey-3_DGri	LINE-like
Jockey-3_DGri	LINE-like
Jockey-3_DGri	LINE-like
Jockey-3_DGri	LINE-like
Jockey-3_DGri	LINE-like
Jockey-3_DGri	LINE-like
Jockey-3_DGri	LINE-like
Jockey-3_DGri	LINE-like
Jockey-3_DGri	LINE-like
Jockey-3_DGri	LINE-like
Jockey-3_DGri	LINE-like
Jockey-3_DGri	LINE-like
Jockey-3_DGri	LINE-like
Jockey-3_DGri	LINE-like
Jockey-3_DGri	LINE-like
Jockey-3_DGri	LINE-like
Jockey-3_DGri	LINE-like
Jockey-3_DGri	LINE-like
Jockey-3_DGri	LINE-like
Jockey-3_DGri	LINE-like
Jockey-3_DGri	LINE-like
Jockey-3_DK	LINE-like
Jockey-3_DPer	LINE-like
Jockey-3_DPer	LINE-like
Jockey-4_DF	LINE-like
Jockey-5_CQ	LINE-like
Jockey-6_CQ	LINE-like
Jockey-6_DK	LINE-like
Jockey-6_DK	LINE-like
Jockey-6_DK	LINE-like
Jockey-6_DK	LINE-like
Jockey-6_DK	LINE-like
Jockey-6_DK	LINE-like
Jockey-6_DK	LINE-like
Jockey-6_DK	LINE-like
Jockey-6_DK	LINE-like
Jockey-6_DK	LINE-like
Jockey-6_DK	LINE-like
Jockey-6_DTa	LINE-like
Jockey-7_LMi	LINE-like
Jockey-8_BF	LINE-like
Jockey-8_LMi	LINE-like
Jockey_Ele10	LINE-like
Jockey_Ele10	LINE-like
L1-10_LSal	LINE
L1-11_DR	LINE
L1-12_PI	LINE
L1-13_BDi	LINE
L1-15_ALy	LINE
L1-18_ATr	LINE
L1-1_ALy	LINE
L1-1F_Cpo	LINE
L1-1_LSal	LINE
L1-1_NN	LINE
L1-1_PApha	LINE
L1-1_PApha	LINE
L1-1_PApha	LINE
L1-1_PApha	LINE
L1-1_PApha	LINE
L1-1_PApha	LINE
L1-1_PApha	LINE
L1-1_PApha	LINE
L1-1_PSoja	LINE
L1-1_PSoja	LINE
L1-1_PUlti	LINE
L1-1_STu	LINE
L1-1_Tbel	LINE
L1-1_XL	LINE
L1-21_Lch	LINE
L1-21_Lch	LINE
L1-26_ACar	LINE
L1-27_CPa	LINE
L1-2a_MD	LINE
L1-2a_MD	LINE
L1-2a_MD	LINE
L1-2a_MD	LINE
L1-2a_MD	LINE
L1-2_CGr	LINE
L1-2_NN	LINE
L1-2_PR	LINE
L1-2_VC	LINE
L1-2_VC	LINE
L1-3_BDi	LINE
L1-3_Cpo	LINE
L1-3_PI	LINE
L1-3_VC	LINE
L1-3_ZM	LINE
L1-42A_XT	LINE
L1-42_LSal	LINE
L1-43_DR	LINE
L1-47B_ACar	LINE
L1-48_AAe	LINE
L1-48_DR	LINE
L1-4_BF	LINE
L1-4_CPB	LINE
L1-4_NN	LINE
L1-6_CR	LINE
L1-6_CR	LINE
L1-6_CR	LINE
L1-6_CR	LINE
L1-6_SBi	LINE
L1-6_VC	LINE
L1-85_ACar	LINE
L1-90_ACar	LINE
L1-94_DR	LINE
L1_AC_16	LINE
L1_AC_7	LINE
L1A_OC	LINE
L1B_Mim	LINE
L1_Ele19	LINE
L1_Ele28	LINE
L1_Ele5	LINE
L1_Ele5	LINE
L1_Ele5	LINE
L1_Ele5	LINE
L1MB3_5	LINE
L1-N6_CQ	LINE
LatiHarb1-1	DNA element
LatiHarb1-1	DNA element
LatiHarb1-2	DNA element
LatiHarb1-2	DNA element
LatiHarb1-2	DNA element
LatiHarb1-N1	DNA element
LINE-05_OS	LINE
LINE1-11_OS	LINE
LINE1-11_ZM	LINE
LINE1-16_ZM	LINE
LINE1-25_SBi	LINE
LINE1-27_ZM	LINE
LINE1-36_OS	LINE
LINE1-42_ZM	LINE
LINE1-45_OS	LINE
LINE1-54_OS	LINE
LINE1-57_SBi	LINE
LINE1-58_SBi	LINE
LINE1-58_SBi	LINE
LINE1-59_SBi	LINE
LINE1-67_SBi	LINE
LINE1-8_OS	LINE
LINE1H_MT	LINE
LitSINE1	SINE
LitSINE1	SINE
LitSINE1	SINE
LitSINE1	SINE
LitSINE1	SINE
LitSINE1	SINE
LitSINE1	SINE
LitSINE1	SINE
Mariner-106_CCri	TIR
Mariner-106_CCri	TIR
Mariner-11_BM	TIR
Mariner-11_LCh	TIR
Mariner-12_LHu	TIR
Mariner-13_SIn	TIR
MARINER14_CB	TIR
Mariner-15_SIn	TIR
Mariner-16_CCri	TIR
Mariner-16_HM	TIR
Mariner-17_AEc	TIR
Mariner-17_AEc	TIR
Mariner-17_AEc	TIR
Mariner-17_AEc	TIR
MARINER17_CB	TIR
Mariner-19_HSal	TIR
Mariner-1_CPB	TIR
Mariner-1_MLP	TIR
Mariner-1_PSo	TIR
Mariner-21_HM	TIR
MARINER22_CB	TIR
Mariner-22_LCh	TIR
Mariner-24_HSal	TIR
Mariner-29_AEc	TIR
Mariner-2_AAe	TIR
Mariner-2_AAe	TIR
Mariner-2_AN	TIR
Mariner-2_AN	TIR
Mariner-2_AN	TIR
Mariner-2_AN	TIR
Mariner2N1_AO	TIR
Mariner2N1_AO	TIR
Mariner2N1_AO	TIR
Mariner-2_SLL	TIR
Mariner-2_SLL	TIR
Mariner-31_CCri	TIR
Mariner3-4_LMi	TIR
Mariner3-4_LMi	TIR
Mariner-36_CGi	TIR
Mariner-39_SSa	TIR
Mariner-3_PR	TIR
Mariner-4_AN	TIR
Mariner-50N1_HSal	TIR
Mariner-52_HSal	TIR
Mariner-52N1_HSal	TIR
Mariner-59N1_HSal	TIR
Mariner-62_HSal	TIR
Mariner-62_HSal	TIR
Mariner-62_HSal	TIR
Mariner-78_LMi	TIR
Mariner-8_PR	TIR
MarinerL-1_AO	TIR
MarinerL-1_CR	TIR
MarinerL-1_CR	TIR
MarinerL-1_CR	TIR
MarinerL-1_CR	TIR
MarinerL-1_CR	TIR
Mariner-N12_OS	TIR
Mariner-N13_HSal	TIR
Mariner-N13_HSal	TIR
Mariner-N13_HSal	TIR
Mariner-N1_ACar	TIR
Mariner-N22_AG	TIR
Mariner-N22_LMi	TIR
Mariner-N32_LSal	TIR
PYRET_I	LTR/Gypsy
PYRET_I	LTR/Gypsy
PYRET_I	LTR/Gypsy
PYRET_I	LTR/Gypsy
PYRET_I	LTR/Gypsy
PYRET_I	LTR/Gypsy
PYRET_I	LTR/Gypsy
PYRET_I	LTR/Gypsy
PYRET_I	LTR/Gypsy
PYRET_I	LTR/Gypsy
PYRET_I	LTR/Gypsy
PYRET_I	LTR/Gypsy
PYRET_I	LTR/Gypsy
PYRET_I	LTR/Gypsy
PYRET_I	LTR/Gypsy
PYRET_I	LTR/Gypsy
PYRET_I	LTR/Gypsy
PYRET_I	LTR/Gypsy
PYRET_I	LTR/Gypsy
PYRET_I	LTR/Gypsy
PYRET_I	LTR/Gypsy
PYRET_I	LTR/Gypsy
PYRET_I	LTR/Gypsy
R1-3_DWi	LINE-like
R1-7_DPer	LINE-like
R1_DEr	LINE-like
R1_DPe	LINE-like
R1_DPs	LINE-like
R1_DPs	LINE-like
R1_DPs	LINE-like
R1_DPs	LINE-like
R1_DPs	LINE-like
R1_DPs	LINE-like
R1_DYa	LINE-like
R1_DYa	LINE-like
R1_DYa	LINE-like
R1_DYa	LINE-like
R1_DYa	LINE-like
R1_DYa	LINE-like
R1_DYa	LINE-like
R1_DYa	LINE-like
R1_DYa	LINE-like
R1_DYa	LINE-like
R1_DYa	LINE-like
R1_DYa	LINE-like
R2-1_IS	LINE-like
R2-1_PPap	LINE-like
R2-2_MUn	LINE-like
R2_DSi	LINE-like
tRNA-1_DRe	SINE
tRNA-1_DRe	SINE
tRNA-1_DRe	SINE
tRNA-1_DRe	SINE
tRNA-1_DRe	SINE
tRNA-1_DRe	SINE
tRNA-1_DRe	SINE
tRNA-1_DRe	SINE
tRNA-1_DRe	SINE
tRNA-1_DRe	SINE
tRNA-1_DRe	SINE
tRNA-1_DRe	SINE
tRNA-1_DRe	SINE
tRNA-1_DRe	SINE
tRNA-1_DRe	SINE
tRNA-1_DRe	SINE
tRNA-1_DRe	SINE
tRNA-1_DRe	SINE
tRNA-1_DRe	SINE
tRNA-1_DRe	SINE
tRNA-1_DRe	SINE
tRNA-1_DRe	SINE
tRNA-1_DRe	SINE
tRNA-1_DRe	SINE
tRNA-1_DRe	SINE
tRNA-1_DRe	SINE
tRNA-1_DRe	SINE
tRNA-1_DRe	SINE
tRNA-1_DRe	SINE
tRNA-1_DRe	SINE
tRNA-1_DRe	SINE
tRNA-1_DRe	SINE
tRNA-1_DRe	SINE
tRNA-1_DRe	SINE
tRNA-1_DRe	SINE
tRNA-1_DRe	SINE
tRNA-1_DRe	SINE
tRNA-1_DRe	SINE
tRNA-1_DRe	SINE
tRNA-1_DRe	SINE
tRNA-1_DRe	SINE
tRNA-1_RPr	SINE
tRNA-1_RPr	SINE
tRNA-1_RPr	SINE
tRNA-1_RPr	SINE
tRNA-2_DRe	SINE
tRNA-2_DRe	SINE
tRNA-2_DRe	SINE
tRNA-2_DRe	SINE
tRNA-2_LSal	SINE
tRNA-3_DRe	SINE
tRNA-3_DRe	SINE
tRNAAlaAGC_CB	SINE
tRNA-Ala-GCA	SINE
TRNA_ASN	SINE
TRNA_ASN	SINE
TRNA_ASN	SINE
TRNA_ASN	SINE
TRNA_ASN	SINE
tRNA-Asp-GAY	SINE
tRNA-Asp-GAY	SINE
tRNA-Asp-GAY	SINE
tRNA-Asp-GAY	SINE
tRNA-Asp-GAY	SINE
tRNA-Asp-GAY	SINE
tRNA-Asp-GAY	SINE
tRNA-Asp-GAY	SINE
tRNA-Asp-GAY	SINE
tRNA-Asp-GAY	SINE
tRNA-Asp-GAY	SINE
tRNA-Asp-GAY	SINE
tRNA-Asp-GAY	SINE
tRNA-Asp-GAY	SINE
tRNA-Asp-GAY	SINE
tRNA-Asp-GAY	SINE
tRNA-Asp-GAY	SINE
tRNA-Gln_OS	SINE
tRNAGlyGGC_CB	SINE
tRNA-Ile-ATT	SINE
tRNA-Ile-ATT	SINE
tRNA-Ile-ATT	SINE
tRNA-Ile-ATT	SINE
tRNA-Ile-ATT	SINE
tRNA-Ile-ATT	SINE
tRNA-Leu-CTA	SINE
tRNA-Leu-CTA	SINE
tRNA-Leu-CTA	SINE
tRNALeuCTT_CB	SINE
tRNALeuCTT_CB	SINE
tRNALeuCTT_CB	SINE
tRNALeuCTT_CB	SINE
tRNALeuCTT_CB	SINE
tRNALeuCTT_CB	SINE
tRNA-Leu-TTG	SINE
tRNA-Leu-TTG	SINE
tRNA-Leu-TTG	SINE
tRNA-Leu-TTG	SINE
tRNA-Leu-TTG	SINE
tRNA-Leu-TTG	SINE
tRNA-Met-i	SINE
tRNA-Met-i	SINE
tRNA-Met-i	SINE
tRNA-Met-i	SINE
tRNA-Met-i	SINE
tRNA-Met-i	SINE
tRNA-Met-i	SINE
tRNA-Met-i	SINE
tRNA-Met-i	SINE
tRNA-Met-i	SINE
tRNA-Met-i	SINE
tRNA-Met-i	SINE
tRNA-Met-i	SINE
tRNA-Phe_OS	SINE
tRNA-Phe_OS	SINE
tRNA-Phe_OS	SINE
tRNA-Phe_OS	SINE
tRNA-Phe_OS	SINE
tRNA-Phe_OS	SINE
tRNA-Phe_OS	SINE
tRNA-Phe_OS	SINE
tRNA-Phe_OS	SINE
tRNA-Phe_OS	SINE
tRNA-Phe_OS	SINE
tRNA-Phe_OS	SINE
tRNA-Phe_OS	SINE
tRNA-Phe_OS	SINE
tRNA-Phe_OS	SINE
tRNA-Phe_OS	SINE
tRNA-Phe_OS	SINE
tRNA-Phe_OS	SINE
tRNA-Phe_OS	SINE
tRNA-Pro2_OS	SINE
tRNA-Pro2_OS	SINE
tRNA-Pro2_OS	SINE
tRNA-Pro-CCA	SINE
tRNA-Pro-CCA	SINE
tRNA-Pro_OS	SINE
tRNA-Pro_OS	SINE
tRNA-Pro_OS	SINE
tRNA-Pro_OS	SINE
tRNA-Pro_OS	SINE
tRNA-Pro_OS	SINE
tRNA-Pro_OS	SINE
tRNA-Ser_OS	SINE
tRNA-Thr_OS	SINE
tRNA-Trp_OS	SINE
tRNA-Trp_OS	SINE
tRNA-Trp_OS	SINE
tRNA-Trp_OS	SINE
tRNA-Trp_OS	SINE
tRNA-Trp_OS	SINE
tRNA-Trp_OS	SINE
tRNA-Trp_OS	SINE
tRNA-Trp_OS	SINE
tRNA-Trp_OS	SINE
tRNA-Tyr_OS	SINE
tRNA-Val_OS	SINE
tRNA-Val_OS	SINE
tRNA-Val_OS	SINE
tRNA-Val_OS	SINE
tRNA-Val_OS	SINE
tRNA-Val_OS	SINE
tRNA-Val_OS	SINE
tRNA-Val_OS	SINE
tRNA-Val_OS	SINE
tRNA-Val_OS	SINE
tRNA-Val_OS	SINE
tRNA-Val_OS	SINE
tRNA-Val_OS	SINE
tRNA-Val_OS	SINE
tRNA-Val_OS	SINE
tRNA-Val_OS	SINE
tRNA-Val_OS	SINE
tRNA-Val_OS	SINE
tRNA-Val_OS	SINE
Zisupton-1_DR	DNA element
Zisupton-6_DR	DNA element
Zisupton-6_DR	DNA element
Zisupton-6_DR	DNA element
Zisupton-6_DR	DNA element
Zisupton-6_DR	DNA element
Zisupton-6_DR	DNA element
Zisupton-6_DR	DNA element
Zisupton-6_DR	DNA element
Zisupton-6_DR	DNA element
Zisupton-6_DR	DNA element
Zisupton-7_DR	DNA element
Zisupton-7_DR	DNA element
Zisupton-7_DR	DNA element
Zisupton-7_DR	DNA element
Zisupton-7_DR	DNA element
Zisupton-7_DR	DNA element
Zisupton-7_DR	DNA element
Zisupton-7_DR	DNA element
Zisupton-7_DR	DNA element
Zisupton-7_DR	DNA element
Zisupton-7_DR	DNA element
Tad1-12_BG	LINE
Tad1-1_BG	LINE
Tad1-1_PGr	LINE
Tad1-1_PTrit	LINE
Tad1-20_BG	LINE
Tad1-28B_BG	LINE
Tad1-3_PTrit	LINE
Tad1-49_BG	LINE
Tad1-55_BG	LINE
Tad1-6_BG	LINE
Tad1-6_PGr	LINE
TART_DV	Non-LTR
TART_DV	Non-LTR
TART_DV	Non-LTR
TART_DV	Non-LTR
TART_DV	Non-LTR
TART_DV	Non-LTR
TART_DV	Non-LTR
TART_DV	Non-LTR
TART_DV	Non-LTR
TART_DV	Non-LTR
TART_DV	Non-LTR
TART_DV	Non-LTR
TART_DV	Non-LTR
TART_DV	Non-LTR
TART_DV	Non-LTR
TART_DV	Non-LTR
TART_DV	Non-LTR
TART_DV	Non-LTR
TART_DV	Non-LTR
TART_DV	Non-LTR
TART_DV	Non-LTR
TART_DV	Non-LTR
TART_DV	Non-LTR
TART_DV	Non-LTR
TART_DV	Non-LTR
TART_DV	Non-LTR
TART_DV	Non-LTR
TART_DV	Non-LTR
TART_DV	Non-LTR
TART_DV	Non-LTR
TART_DV	Non-LTR
TART_DV	Non-LTR
TART_DV	Non-LTR
TART_DV	Non-LTR
Tx1-11_SK	Non-LTR
Tx1-12_Crp	Non-LTR
Tx1-14_CQ	Non-LTR
Tx1-1_CGi	Non-LTR
Tx1-1_PM	Non-LTR
Tx1-34_DR	Non-LTR
Tx1-37_DR	Non-LTR
Tx1-3_PM	Non-LTR
Tx1-3_PM	Non-LTR
Tx1-3_PM	Non-LTR
Tx1-3_PM	Non-LTR
Tx1-3_PM	Non-LTR
Tx1-3_PM	Non-LTR
Tx1-3_PM	Non-LTR
Tx1-3_PM	Non-LTR
Tx1-3_PM	Non-LTR
Tx1-3_PM	Non-LTR
Tx1-3_PM	Non-LTR
Tx1-3_PM	Non-LTR
Tx1-3_PM	Non-LTR
Tx1-3_PM	Non-LTR
Tx1-3_PM	Non-LTR
Tx1-3_PM	Non-LTR
Tx1-3_PM	Non-LTR
Tx1-3_PM	Non-LTR
Tx1-3_PM	Non-LTR
Tx1-3_PM	Non-LTR
Tx1-3_PM	Non-LTR
Tx1-3_PM	Non-LTR
Tx1-3_PM	Non-LTR
Tx1-3_PM	Non-LTR
Tx1-3_PM	Non-LTR
Tx1-3_PM	Non-LTR
Tx1-3_PM	Non-LTR
Tx1-3_PM	Non-LTR
Tx1-41_DR	Non-LTR
Tx1-5_PM	Non-LTR
Tx1-5_PM	Non-LTR
Tx1-5_PM	Non-LTR
Tx1-5_PM	Non-LTR
Tx1-5_PM	Non-LTR
Tx1-5_PM	Non-LTR
Tx1-6_SSa	Non-LTR
Tx1-7_CQ	Non-LTR
Vingi-10_LMi	Non-LTR
Vingi-14_LMi	Non-LTR
Vingi-18_LMi	Non-LTR
Vingi-2_PH	Non-LTR
Vingi-33_LMi	Non-LTR
Vingi-3_LMi	Non-LTR
Vingi-42_LMi	Non-LTR
Vingi-5_CPB	Non-LTR
Vingi-7_AMi	Non-LTR
VLINE8_VV	LINE
VLINE9_VV	LINE
RT1	LINE-like
RT1	LINE-like
RT1	LINE-like
RT1	LINE-like
RT1	LINE-like
RT1	LINE-like
RT1	LINE-like
RT1	LINE-like
RT1	LINE-like
RT1	LINE-like
RT1	LINE-like
RT2	LINE-like
RTAg3	LINE-like
RTAg4	LINE-like
RTAg4	LINE-like
RTAg4	LINE-like
RTAg4	LINE-like
RTAg4	LINE-like
RTAg4	LINE-like
RTAg4	LINE-like
RTAg4	LINE-like
RTAg4	LINE-like
RTAg4	LINE-like
RTAg4	LINE-like
RTAg4	LINE-like
RTAg4	LINE-like
RTAg4	LINE-like
RTAg4	LINE-like
RTAg4	LINE-like
RTAg4	LINE-like
RTAg4	LINE-like
RTAg4	LINE-like
RTAg4	LINE-like
RTAg4	LINE-like
RTAg4	LINE-like
RTAg4	LINE-like
RTAg4	LINE-like
RTAg4	LINE-like
RTAg4	LINE-like
RTAg4	LINE-like
RTAg4	LINE-like
RTAg4	LINE-like
RTAg4	LINE-like
RTAg4	LINE-like
RTAg4	LINE-like
RTAg4	LINE-like
RTAg4	LINE-like
RTAg4	LINE-like
RTAg4	LINE-like
RTAg4	LINE-like
CR1-101_AAe	Non-LTR
CR1-117_AAe	Non-LTR
CR1-122_AAe	Non-LTR
CR1-124_AAe	Non-LTR
CR1-12_AG	Non-LTR
CR1-17_NV	Non-LTR
CR1-18_NV	Non-LTR
CR1-1_AG	Non-LTR
CR1-2B_Croc	Non-LTR
CR1-2_DPer	Non-LTR
CR1-2_HMM	Non-LTR
CR1-46_AAe	Non-LTR
CR1-4_NVi	Non-LTR
CR1-4_TCa	Non-LTR
CR1-53_AAe	Non-LTR
CR1-54_HM	Non-LTR
CR1-6_DT	Non-LTR
CR1-6_NVi	Non-LTR
CR1-75_HM	Non-LTR
CR1-79_HM	Non-LTR
CR1-79_HM	Non-LTR
CR1-8_CQ	Non-LTR
CR1-8_CQ	Non-LTR
CR1-98_AAe	Non-LTR
CR1-9_NV	Non-LTR
CR1-9_NV	Non-LTR
CR1_Ele2	Non-LTR
CR1_Ele29	Non-LTR
CR1_Ele35	Non-LTR
CR1-J1_Pass	Non-LTR
CR1-Y_Pass	Non-LTR
CRE-15_CCri	LINE
CRE-15_CCri	LINE
CRE-1_ACas	LINE
Cre-1_FCy	LINE
Cre-2_BM	LINE
CRE-5_CCri	LINE
CRE-5_HRo	LINE
CRM_INT	LTR
Crypton-1_CTe	DNA element
CryptonC-5_CCri	DNA element
CryptonF-2_CGlo	DNA element
CryptonF-2_CGlo	DNA element
CryptonF-2_PI	DNA element
CryptonH-4_HM	DNA element
CryptonH-5_HM	DNA element
CryptonS-11_PS	DNA element
CryptonS-20_PI	DNA element
CryptonS-N2_PS	DNA element
CryptonV-10_CFl	DNA element
CryptonV-2_DR	DNA element
CryptonV-2_DR	DNA element
CryptonV-N1_SSa	DNA element
CryptonV-N2_DR	DNA element
CryptonV-N5_DR	DNA element
CryptonV-N5_DR	DNA element
CryptonV-N5_DR	DNA element
CSINE2	SINE
CSINE2	SINE
Dada-1_BF	DNA element
Dada-1_CGi	DNA element
Dada-1_GM	DNA element
Dada-tL_DR	DNA element
Dada-tL_DR	DNA element
Dada-tY_PMar	DNA element
Dada-tY_PMar	DNA element
Dada-tY_PMar	DNA element
Dada-U1A_DR	DNA element
Dada-U1A_DR	DNA element
Dada-U6_GA	DNA element
Dada-U6_OL	DNA element
Daphne-18_HM	Non-LTR
Daphne-20_HRo	Non-LTR
Daphne-2_CTe	Non-LTR
Daphne-38_HRo	Non-LTR
Daphne-38_HRo	Non-LTR
Daphne-38_HRo	Non-LTR
Daphne-6_HRo	Non-LTR
Daphne-7_HMM	Non-LTR
Daphne-7_HMM	Non-LTR
Daphne-7_LMi	Non-LTR
Daphne-98_HMa	Non-LTR
DIRS-11B_CPB	LTR
DIRS-11C_CPB	LTR
DIRS-17_CCri	LTR
DIRS-18_NV	LTR
DIRS-1_CR	LTR
DIRS-1_CR	LTR
DIRS-1_CR	LTR
DIRS-1_DPu	LTR
DIRS-1_LCh	LTR
DIRS-1_MLP-I	LTR
DIRS-20_XT	LTR
DIRS-21A_XT	LTR
DIRS-26_NV	LTR
DIRS-27_ACar	LTR
DIRS-27_CPB	LTR
DIRS-28_XT	LTR
DIRS-29_CPB	LTR
DIRS-2_GA	LTR
DIRS-32_ACar	LTR
DIRS-41_XT	LTR
DIRS-43_XT	LTR
DIRS-4B_CPB	LTR
DIRS-4_CPB	LTR
DIRS-4_DR	LTR
DIRS-4_DR	LTR
DIRS-4_DR	LTR
DIRS-4_SP	LTR
DIRS-6_CCri	LTR
DIRS-6_XT	LTR
DIRS-8B_DR	LTR
DIRS-8B_DR	LTR
DIRS-8_DR	LTR
DIRS-8_DR	LTR
DIRS-8_DR	LTR
DIRS-8_DR	LTR
DIRS-8_DR	LTR
DIRS-8_DR	LTR
DIRS-8_DR	LTR
DIRS-9A_XT	LTR
DIRS-9_Lch	LTR
DIRSQ-3_OD	LTR
DNA-11_CGi	DNA element
DNA-11_CGi	DNA element
DNA-16_HM	DNA element
DNA-17_CCri	DNA element
DNA-17_CCri	DNA element
DNA2-10_CGi	DNA element
DNA2-10_CGi	DNA element
DNA2-10_CGi	DNA element
DNA2-7_CGi	DNA element
DNA-2_LMi	DNA element
DNA-2_LMi	DNA element
DNA3-11_Mad	DNA element
DNA3-12_Mad	DNA element
DNA3-13B_CGi	DNA element
DNA3-3_MLP	DNA element
DNA-3-3_NV	DNA element
DNA3-4_CGi	DNA element
DNA3-9_LMi	DNA element
DNA-3_AN	DNA element
DNA4-24_CGi	DNA element
DNA55_AFC	DNA element
DNA8-10_CGi	DNA element
DNA8-12_CGi	DNA element
DNA8-1_PGr	DNA element
DNA8-25_DR	DNA element
DNA8-27B_DR	DNA element
DNA8-2_CQ	DNA element
DNA-8-3_HM	DNA element
DNA-8-3_HM	DNA element
DNA8-4B_LMi	DNA element
DNA8-5D_OS	DNA element
DNA9-20_OS	DNA element
DNA9-3_DR	DNA element
DNA9-3_DR	DNA element
DNA9-3_DR	DNA element
DNA9-4_CGi	DNA element
DNA9-6B_ATr	DNA element
DNA-like-11_Hmel	DNA element
DNA-N43_DR	DNA element
DNA-N43_DR	DNA element
DNA-N4_DR	DNA element
DNA-N4_DR	DNA element
DNA-N4_DR	DNA element
DNA-N4_DR	DNA element
DNAREP1_DYak	DNA element
DNA-TA-2_STu	DNA element
EnSpm-10_CCri	TIR
EnSpm-12_CCri	TIR
EnSpm-12_CCri	TIR
EnSpm12_SB	TIR
[truncated: 943 more rows]
