# Supplementary material for: The Landscape of Repetitive Elements in the Refined Genome of Chilli Anthracnose Fungus Colletotrichum truncatum
Source: Front Microbiol. 2018 Oct 4;9:2367. doi: 10.3389/fmicb.2018.02367 (PMC6180176; doi:10.3389/fmicb.2018.02367)
Supplement: Supplementary file 4 [file Table_4.XLSX]

## Sheet: Sheet1
Table S4. The mono- to hexa-nucleotide SSR motifs with the highest frequencies of occurrence in the genomes of seven Colletotrichum species
Repeats	C. chlorophyti		C. graminicola		C. higgisianum		C.orbiculare		C. orchidophilum		C. scovillei		C. truncatum
Mono-	A/T	4789	A/T	3565	A/T	1886	A/T	1505	A/T	4499	A/T	2235	A/T	7658
	C/G	1033	C/G	4028	C/G	4064	C/G	542	C/G	2291	C/G	1000	C/G	1740
Di-	AC/GT	506	AC/GT	1420	AC/GT	1762	AC/GT	613	AC/GT	622	AC/GT	521	AC/GT	975
	AG/CT	631	AG/CT	1989	AG/CT	2385	AG/CT	726	AG/CT	1042	AG/CT	889	AG/CT	969
	AT/AT	585	AT/AT	1013	AT/AT	202	AT/AT	4577	AT/AT	249	AT/AT	204	AT/AT	327
	CG/CG	33	CG/CG	132	CG/CG	107	CG/CG	59	CG/CG	61	CG/CG	63	CG/CG	35
Tri-	CCG/CGG	223	CCG/CGG	498	CCG/CGG	794	AAT/ATT	3366	AGC/CTG	382	AGC/CTG	355	AGC/CTG	365
	AAG/CTT	214	AGC/CTG	496	AGC/CTG	680	AGC/CTG	540	CCG/CGG	365	AAT/ATT	262	AAG/CTT	225
	AGC/CTG	193	AAT/ATT	439	ACG/CGT	504	CCG/CGG	423	AGG/CCT	279	ACC/GGT	250	ACC/GGT	218
	ACG/CGT	127	AAG/CTT	374	AGG/CCT	469	ACG/CGT	352	ACC/GGT	269	CCG/CGG	230	CCG/CGG	197
	AGG/CCT	127
Tetra-	AAGT/ACTT	53	ACCT/AGGT	125	ACCT/AGGT	90	ACCT/AGGT	28	AAAT/ATTT	14	ACTC/AGTG	29	AAGC/CTTG	17
	AAAG/CTTT	20	AGGC/CCTG	107	ACTC/AGTG	67	AGCC/CTGG	22	ACCT/AGGT	14	ATCC/ATGG	17	ATCC/ATGG	17
	AAGG/CCTT	13	ACAG/CTGT	56	ATCC/ATGG	57	ACTC/AGTG	20	ATCC/ATGG	13	ACCT/AGGT	13	AAAG/CTTT	10
	AAAT/ATTT	11	ATCC/ATGG	37	ACAG/CTGT	47	ATCC/ATGG	9	ACTC/AGTG	12	ACAG/CTGT	8	ACAT/ATGT	10
Penta-	AAGGT/ACCTT	8	ACAGC/CTGTG	13	ACAGC/CTGTG	11	ACCAG/CTGGT	9	AAGGC/CCTTG	6	AAGGC/CCTTG	7	ACAGC/CTGTG	4
	AAAAG/CTTTT	6	ATGCC/ATGGC	11	ATCCC/ATGGG	11	ATCCC/ATGGG	8	ACCGC/CGGTG	5	AAGGT/ACCTT	7	AAAAG/CTTTT	3
	AAGGC/CCTTG	6	AAAAG/CTTTT	7	AAGGC/CCTTG	9	ATCGC/ATGCG	8	AAGGG/CCCTT	4	ACCTC/AGGTG	7	ACCAG/CTGGT	3
	ATCCC/ATGGG	6	AAGGC/CCTTG	7	ACCGC/CGGTG	9	AGCCC/CTGGG	7	ACCAG/CTGGT	3	AGCCC/CTGGG	4	AACGC/CGTTG	2
									ACCTC/AGGTG	3			AAGGC/CCTTG	2
									AGCCC/CTGGG	3			AGCTC/AGCTG	2
Hexa-	AACCCT/AGGGTT	16	AACCCT/AGGGTT	11	AACCCT/AGGGTT	23	AACCCT/AGGGTT	11	AACCCT/AGGGTT	18	AACCCT/AGGGTT	25	ACCAGC/CTGGTG	4
	AACAGG/CCTGTT	2	AACAGC/CTGTTG	4	ACTCTC/AGAGTG	12	AACAGC/CTGTTG	7	ACCAGC/CTGGTG	6	AAAGGC/CCTTTG	2	AGAGCC/CTCTGG	4
	AACCAC/GGTTGT	2	AAGCAG/CTGCTT	4	AACAGC/CTGTTG	8	ACCAGC/CTGGTG	5	AACAGC/CTGTTG	5	AAGCAG/CTGCTT	2	ACCAGT/ACTGGT	2
	ACGGGG/CCCCGT	2	AGCTCC/AGCTGG	4	ACCAGC/CTGGTG	4	ACCCAG/CTGGGT	4	AGAGCC/CTCTGG	4	AATAGT/ACTATT	2	ACCGTG/ACGGTC	2
	ACTGGG/AGTCCC	2			AGAGCC/CTCTGG	4	AGCCGG/CCGGCT	4	AGCCTG/AGGCTC	4	ACACTC/AGTGTG	2	AGGGGG/CCCCCT	2
	AGATGC/ATCTGC	2									ACGCAG/CGTCTG	2
	AGCAGG/CCTGCT	2									AGAGGC/CCTCTG	2
											AGCAGG/CCTGCT	2
